## Correction

# Correction: Cytomegalovirus m154 Hinders CD48 Cell-Surface Expression and Promotes Viral Escape from Host Natural Killer Cell Control

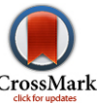

## The *PLOS Pathogens* Staff

In the Funding section, a grant from REIPI is incorrectly omitted. The Funding statement should read: “This study was supported by the Ministerio de Ciencia e Innovación (MICINN, Spain) through grants SAF 2011-25155 (to AA), and SAF 2012-39536 (to PE), the REIPI grant RD12/ 0015/0018 (to AA and PE), and the TransMedRi grant, No. 256686 (FP7-REGPOT-2010-5; to SJ). NPC and DF were supported by a Formación de Profesorado Universitario fellowship and a Juan de la Cierva postdoctoral contract from the MICINN. The funders had no role in study design, data collection and analysis, decision to publish, or preparation of the manuscript.”

## Reference

1. Zarama A, Pérez-Carmona N, Farré D, Tomic A, Borst EM, et al. (2014) Cytomegalovirus m154 Hinders CD48 Cell-Surface Expression and Promotes Viral Escape from Host Natural Killer Cell Control. *PLoS Pathog* 10(3): e1004000. doi:10.1371/journal.ppat.1004000

**Citation:** The *PLOS Pathogens* Staff (2014) Correction: Cytomegalovirus m154 Hinders CD48 Cell-Surface Expression and Promotes Viral Escape from Host Natural Killer Cell Control. *PLoS Pathog* 10(4): e1004121. doi:10.1371/journal.ppat.1004121

**Published** April 15, 2014

**Copyright:** © 2014 The *PLOS Pathogens* Staff. This is an open-access article distributed under the terms of the Creative Commons Attribution License, which permits unrestricted use, distribution, and reproduction in any medium, provided the original author and source are credited.
